# Supplementary material for: Time-dependent emission stokes shift in Au, Ag and Au/Ag fluorescent nanoclusters: evidence of multiple emissive states
Source: Royal Society of Chemistry journal article supplement (doi:10.1039/c8pp00540k), 2019-05-06
Supplement: c8pp00540k1.pdf [file c8pp00540k1.pdf]

## **Supporting Information on**

### **Time-dependent Emission Stokes Shift in Au, Ag and Au/Ag Fluorescent Nanoclusters : Evidence of Multiple Emissive States**

**Nabaruna Basu and Debabrata Mandal\***

Department of Chemistry, University of Calcutta,

92, APC Road, Kolkata 700009, India

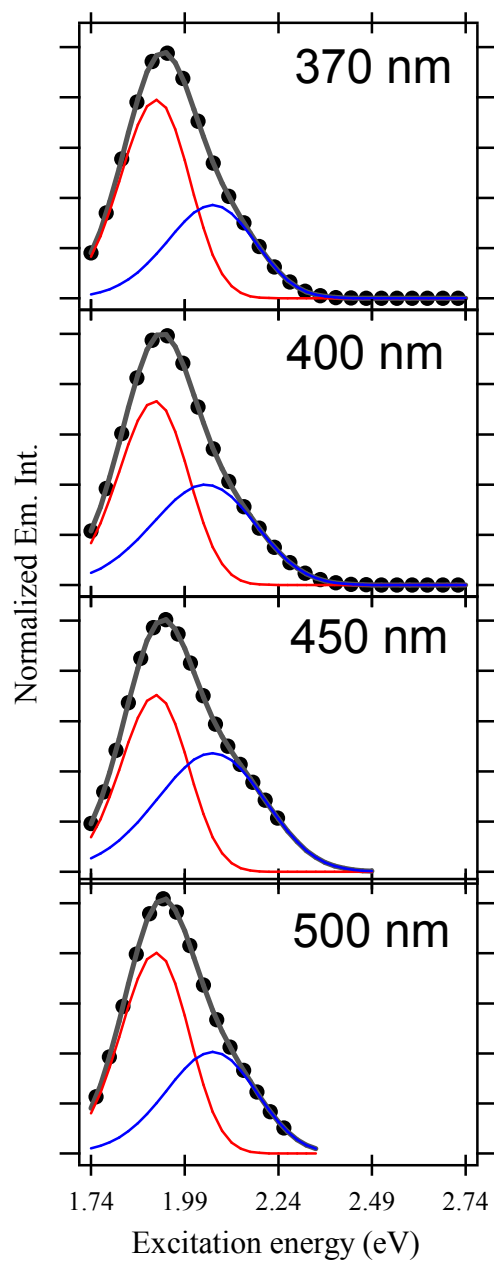

**Figure SF1.** Normalized emission spectrum of Au nanoclusters at different excitation wavelengths (as indicated) plotted along with the component peaks obtained by double lognormal fitting. Markers black solid line represent the original and fitted spectra respectively. Blue and red lines stand for the deconvoluted components.

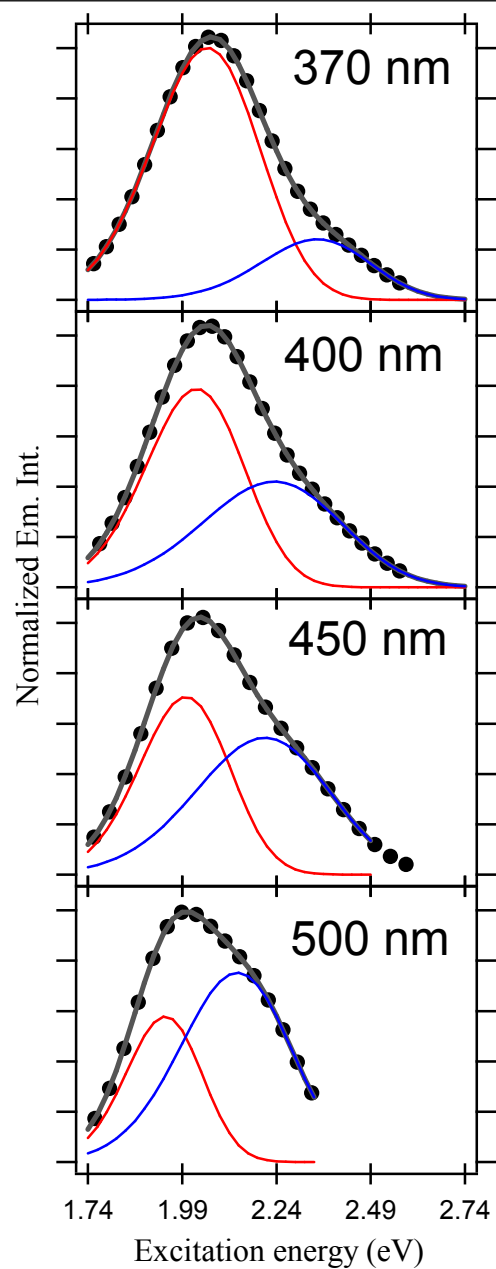

**Figure SF2.** Normalized emission spectrum of Au/Ag nanoclusters at different excitation wavelengths (as indicated) plotted along with the component peaks obtained by double lognormal fitting. Markers black solid line represent the original and fitted spectra respectively. Blue and red lines stand for the deconvoluted components.

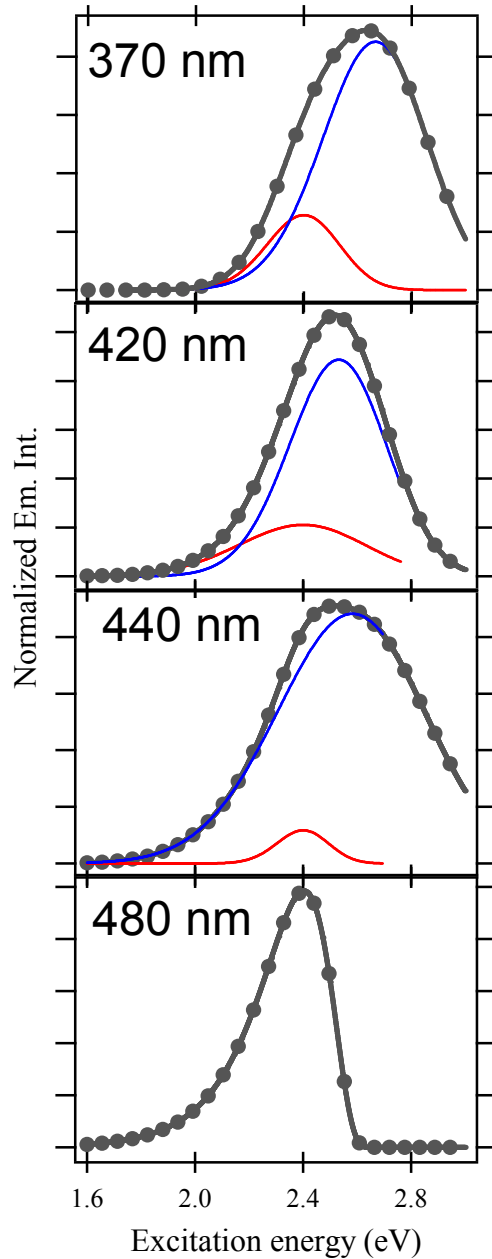

**Figure SF3.** Normalized emission spectrum of Ag nanoclusters at different excitation wavelengths (as indicated) plotted along with the component peaks obtained by double/single lognormal fitting. Markers black solid line represent the original and fitted spectra respectively. Blue and red lines stand for the deconvoluted components.

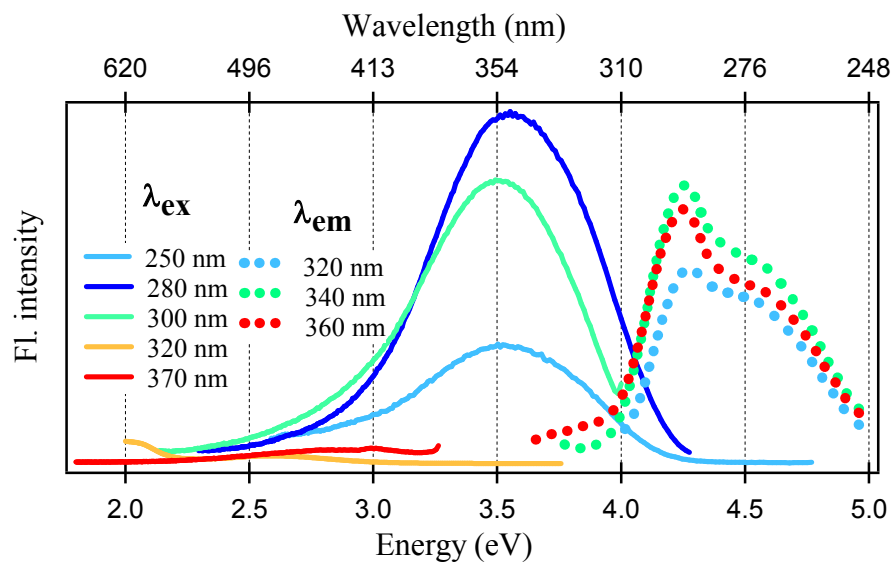

**Figure SF4.** Emission spectra (solid curves) and excitation spectra (dotted curves) of BSA at different excitation ( $\lambda_{ex}$ ) and emission ( $\lambda_{em}$ ) wavelengths respectively, as indicated.

**Table ST1. Emission and excitation peak positions of the nanoclusters at different excitation and emission energies (obtained from lognormal fitting)\***

| <b>i) Au nanoclusters</b>     |                               |                                |          |
|-------------------------------|-------------------------------|--------------------------------|----------|
| $\lambda_{\text{ex}}$ (nm)    | Low energy emission peak (eV) | High energy emission peak (eV) | $\chi^2$ |
| 370                           | 1.91                          | 2.06                           | 0.054    |
| 400                           | 1.91                          | 2.05                           | 0.082    |
| 420                           | 1.90                          | 2.05                           | 0.086    |
| 440                           | 1.91                          | 2.06                           | 0.087    |
| 450                           | 1.91                          | 2.06                           | 0.091    |
| 460                           | 1.92                          | 2.06                           | 0.088    |
| 480                           | 1.92                          | 2.06                           | 0.082    |
| 500                           | 1.91                          | 2.06                           | 0.076    |
| 520                           | 1.91                          | 2.06                           | 0.077    |
| 550                           | 1.89                          | 2.04                           | 0.073    |
| $\lambda_{\text{em}}$ (nm)    | Excitation peak (eV)          |                                |          |
| 580                           | 2.53                          |                                | 0.032    |
| 600                           | 2.49                          |                                | 0.011    |
| 620                           | 2.48                          |                                | 0.012    |
| 640                           | 2.44                          |                                | 0.017    |
| 660                           | 2.42                          |                                | 0.029    |
| 680                           | 2.41                          |                                | 0.052    |
| 700                           | 2.39                          |                                | 0.156    |
| <b>ii) Au/Ag nanoclusters</b> |                               |                                |          |
| $\lambda_{\text{ex}}$ (nm)    | Low energy emission peak (eV) | High energy emission peak (eV) | $\chi^2$ |
| 370                           | 2.06                          | 2.35                           | .811     |
| 400                           | 2.03                          | 2.23                           | .758     |
| 420                           | 2.02                          | 2.23                           | .684     |
| 440                           | 2.01                          | 2.22                           | .599     |
| 450                           | 2.00                          | 2.21                           | .420     |
| 460                           | 1.99                          | 2.19                           | .476     |
| 480                           | 1.97                          | 2.18                           | .411     |
| 500                           | 1.95                          | 2.14                           | .275     |
| 520                           | 1.93                          | 2.10                           | .294     |

| Au/Ag nanoclusters         |                                 |                                  |          |
|----------------------------|---------------------------------|----------------------------------|----------|
| $\lambda_{em}$ (nm)        | Low energy excitation peak (eV) | High energy excitation peak (eV) | $\chi^2$ |
| 480                        | 2.78                            | 2.95                             | 0.024    |
| 500                        | 2.62                            | 2.91                             | 0.036    |
| 520                        | 2.62                            | 2.92                             | 0.081    |
| 540                        | 2.65                            | 2.92                             | 0.056    |
| 560                        | 2.35                            | 2.81                             | 0.139    |
| 580                        | 2.32                            | 2.81                             | 0.155    |
| 600                        | 2.32                            | 2.81                             | 0.173    |
| 620                        | 2.31                            | 2.80                             | 0.157    |
| 640                        | 2.31                            | 2.78                             | 0.117    |
| 660                        | 2.29                            | 2.76                             | 0.191    |
| 680                        | 2.29                            | 2.75                             | 0.181    |
| <b>ii) Ag nanoclusters</b> |                                 |                                  |          |
| $\lambda_{ex}$ (nm)        | Low energy emission peak (eV)   | High energy emission peak (eV)   | $\chi^2$ |
| 370                        | 2.40                            | 2.67                             | 1.069    |
| 400                        | 2.40                            | 2.58                             | 0.874    |
| 420                        | 2.40                            | 2.53                             | 0.528    |
| 440                        | 2.40                            | 2.53                             | 2.551    |
| 450                        | 2.41                            | 2.54                             | 0.262    |
| 460                        | 2.40                            | 2.54                             | 0.259    |
| 480                        | 2.40                            | -                                | 0.257    |
| $\lambda_{em}$ (nm)        | Excitation peak (eV)            |                                  |          |
| 420                        | 3.23                            |                                  | 0.220    |
| 440                        | 3.07                            |                                  | 0.182    |
| 460                        | 2.95                            |                                  | 0.094    |
| 480                        | 2.82                            |                                  | 0.052    |
| 500                        | 2.76                            |                                  | 0.034    |
| 520                        | 2.72                            |                                  | 0.061    |
| 540                        | 2.70                            |                                  | 0.083    |
| 560                        | 2.69                            |                                  | 0.398    |
| 580                        | 2.69                            |                                  | 1.063    |
| 600                        | 2.68                            |                                  | 1.990    |

\* The exact peak positions of various components in any given spectrum were determined by deconvoluting the spectrum with lognormal fitting (see Results and Discussion). The emission (or excitation) peak positions of the deconvoluted components are listed against their corresponding excitation (or emission) energies, respectively, in Table ST1.

| <b>Table ST2.</b> Fitting parameters for fluorescence time-profiles |               |           |               |           |               |           | $\chi^2$ |
|---------------------------------------------------------------------|---------------|-----------|---------------|-----------|---------------|-----------|----------|
| <b>i)</b> Au nanoclusters                                           |               |           |               |           |               |           |          |
| $\lambda_{em}$ (nm)                                                 | $\tau_1$ (ns) | $a_1$ (%) | $\tau_2$ (ns) | $a_2$ (%) | $\tau_3$ (ns) | $a_3$ (%) |          |
| 550                                                                 | 0.27          | 50        | 1.55          | 38        | 7             | 12        | 4.00     |
| 570                                                                 | 0.30          | 52        | 1.80          | 38        | 10            | 10        | 4.02     |
| 580                                                                 | 0.30          | 53        | 2.00          | 38        | 13            | 09        | 3.96     |
| 590                                                                 | 0.34          | 54        | 2.25          | 37        | 17            | 09        | 3.55     |
| 600                                                                 | 0.37          | 53        | 2.40          | 36        | 22            | 11        | 3.02     |
| 610                                                                 | 0.36          | 52        | 2.50          | 35        | 28            | 13        | 3.15     |
| 620                                                                 | 0.53          | 54        | 3.30          | 29        | 39            | 17        | 2.88     |
| 630                                                                 | 0.50          | 53        | 3.30          | 27        | 46            | 20        | 3.00     |
| 640                                                                 | 0.55          | 49        | 3.75          | 27        | 50            | 24        | 3.08     |
| 650                                                                 | 0.45          | 44        | 2.95          | 29        | 48            | 27        | 3.84     |
| 660                                                                 | 0.65          | 48        | 4.90          | 22        | 62            | 30        | 4.22     |
| 680                                                                 | 1.00          | 48        | 10.75         | 13        | 92            | 39        | 4.56     |
| 700                                                                 | 0.80          | 41        | 8.05          | 15        | 100           | 44        | 4.76     |
| <b>Au/Ag nanoclusters</b>                                           |               |           |               |           |               |           |          |
| $\lambda_{em}$ (nm)                                                 | $\tau_1$ (ns) | $a_1$ (%) | $\tau_2$ (ns) | $a_2$ (%) | $\tau_3$ (ns) | $a_3$ (%) |          |
| 520                                                                 | 0.24          | 55        | 1.60          | 36        | 7             | 10        | 4.06     |
| 530                                                                 | 0.26          | 55        | 1.80          | 36        | 10            | 08        | 3.94     |
| 540                                                                 | 0.28          | 57        | 2.10          | 36        | 13            | 07        | 3.83     |
| 550                                                                 | 0.32          | 57        | 2.30          | 35        | 16            | 07        | 3.68     |
| 570                                                                 | 0.33          | 55        | 2.40          | 36        | 22            | 09        | 3.34     |
| 580                                                                 | 0.35          | 56        | 2.60          | 34        | 25            | 10        | 3.18     |
| 590                                                                 | 0.34          | 55        | 2.60          | 34        | 28            | 11        | 2.98     |
| 600                                                                 | 0.35          | 55        | 2.60          | 33        | 28            | 12        | 3.29     |
| 610                                                                 | 0.33          | 55        | 2.70          | 32        | 31            | 13        | 3.71     |
| 620                                                                 | 0.37          | 56        | 3.00          | 31        | 34            | 13        | 3.96     |
| 630                                                                 | 0.32          | 50        | 2.34          | 35        | 30            | 15        | 4.33     |
| 640                                                                 | 0.27          | 54        | 2.52          | 32        | 31            | 15        | 4.84     |
| 660                                                                 | 0.31          | 54        | 2.64          | 31        | 32            | 16        | 4.97     |
| 680                                                                 | 0.28          | 56        | 2.60          | 29        | 30            | 15        | 5.05     |



| <b>iii) Ag nanoclusters</b> |               |           |               |           |               |           |          |
|-----------------------------|---------------|-----------|---------------|-----------|---------------|-----------|----------|
| $\lambda_{em}$ (nm)         | $\tau_1$ (ns) | $a_1$ (%) | $\tau_2$ (ns) | $a_2$ (%) | $\tau_3$ (ns) | $a_3$ (%) | $\chi^2$ |
| 420                         | 0.16          | 61        | 0.91          | 27        | 5             | 12        | 3.48     |
| 440                         | 0.16          | 77        | 2.85          | 16        | 7             | 07        | 3.21     |
| 450                         | 0.18          | 70        | 2.48          | 20        | 7             | 10        | 3.06     |
| 470                         | 0.18          | 70        | 2.76          | 21        | 7             | 09        | 2.94     |
| 480                         | 0.18          | 68        | 2.73          | 24        | 8             | 08        | 2.67     |
| 490                         | 0.19          | 70        | 2.96          | 22        | 8             | 08        | 2.25     |
| 510                         | 0.19          | 70        | 3.11          | 21        | 8             | 09        | 2.86     |
| 520                         | 0.19          | 68        | 3.00          | 23        | 8             | 09        | 2.88     |
| 530                         | 0.17          | 71        | 3.29          | 23        | 8             | 06        | 3.27     |
| 540                         | 0.19          | 72        | 3.26          | 21        | 8             | 07        | 3.56     |
| 560                         | 0.18          | 73        | 3.27          | 22        | 9             | 05        | 3.82     |
| 580                         | 0.16          | 73        | 2.79          | 22        | 9             | 05        | 3.79     |

| <b>Table ST3. Emission maxima and Stokes shift for the nanoclusters</b> |                                                    |                                                                   |
|-------------------------------------------------------------------------|----------------------------------------------------|-------------------------------------------------------------------|
| i) Au nanoclusters                                                      |                                                    |                                                                   |
| <b>Time (ns)</b>                                                        | <b><math>\nu_{max}(t)</math> (cm<sup>-1</sup>)</b> | <b><math>\nu_{max}(t=0)-\nu_{max}(t)</math> (cm<sup>-1</sup>)</b> |
| 0                                                                       | 16450                                              | 750                                                               |
| 10                                                                      | 15700                                              |                                                                   |
| ii) Au/Ag nanoclusters                                                  |                                                    |                                                                   |
| <b>Time (ns)</b>                                                        | <b><math>\nu_{max}(t)</math></b>                   | <b><math>\nu_{max}(t=0)-\nu_{max}(t)</math> (cm<sup>-1</sup>)</b> |
| 0                                                                       | 18100                                              | 1400                                                              |
| 10                                                                      | 16700                                              |                                                                   |
| iii) Ag nanoclusters                                                    |                                                    |                                                                   |
| <b>Time (ns)</b>                                                        | <b><math>\nu_{max}(t)</math></b>                   | <b><math>\nu_{max}(t=0)-\nu_{max}(t)</math> (cm<sup>-1</sup>)</b> |
| 0                                                                       | 21300                                              | 200                                                               |
| 10                                                                      | 21100                                              |                                                                   |
